# Supplementary material for: Reduced complement of dopaminergic neurons in the substantia nigra pars compacta of mice with a constitutive “low footprint” genetic knockout of alpha-synuclein
Source: PubMed Central journal article supplement (PMC7216632; doi:10.1186/s13041-020-00613-5), 2020-05-11

# Mmrn1

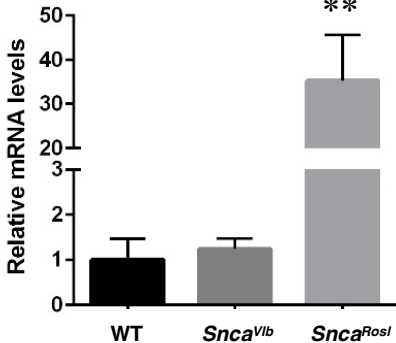

Supplement: 13041_2020_613_MOESM1_ESM.pdf [file 13041_2020_613_MOESM1_ESM.pdf]
